# Supplementary material for: Effect of electron structure on the catalytic activity of LaCoO3 perovskite towards toluene oxidation
Source: Royal Society of Chemistry journal article supplement (doi:10.1039/d2cc00404f), 2022-01-01
Supplement: d2cc00404f1.pdf [file d2cc00404f1.pdf]

1 **Electronic Supplementary Information**

2 **Effect of electron structure on the catalytic activity of LaCoO<sub>3</sub> perovskite**

3 **towards toluene oxidation**

4

5 Hanlin Chen <sup>a, b, d, f</sup>, Peng Liu <sup>a, b, f</sup>, Gaoling Wei <sup>c</sup>, Yu Huang <sup>e</sup>, Xiaojun Lin <sup>a, b, f</sup>,

6 Xiaoliang Liang <sup>a, b, f\*</sup>, Jianxi Zhu <sup>a, b, f</sup>

7

8 <sup>a</sup> CAS Key Laboratory of Mineralogy and Metallogeny/Guangdong Provincial Key

9 Laboratory of Mineral Physics and Materials, Guangzhou Institute of Geochemistry,

10 Chinese Academy of Sciences, Guangzhou 510640, P.R. China;

11 <sup>b</sup> CAS Center for Excellence in Deep Earth Science, Guangzhou, 510640, China;

12 <sup>c</sup> National-Regional Joint Engineering Research Center for Soil Pollution Control and

13 Remediation in South China, Guangdong Key Laboratory of Integrated Agro-

14 environmental Pollution Control and Management, Institute of Eco-environmental and

15 Soil Sciences, Guangdong Academy of Sciences, Guangzhou 510650, China;

16 <sup>d</sup> School of Environmental Science and Technology, Guangdong University of

17 Petrochemical Technology, Maoming 525000, P.R. China;

18 <sup>e</sup> Key Laboratory of Aerosol Chemistry and Physics, State Key Lab of Loess and

19 Quaternary Geology (SKLLQG), Institute of Earth Environment, Chinese Academy

20 of Sciences, Xi'an 710061, China.

21 <sup>f</sup> University of Chinese Academy of Sciences, Beijing 100049, P.R. China.

22

## 23 **Experimental section**

### 24 **Materials and methods**

#### 25 *Catalyst synthesis*

26 LaCoO<sub>3</sub> perovskite was prepared by a one-pot sol-gel method.<sup>1</sup> La(NO<sub>3</sub>)<sub>3</sub>·6H<sub>2</sub>O,  
27 Co(NO<sub>3</sub>)<sub>2</sub>·6H<sub>2</sub>O, and citric acid (CA) of analytical grade were dissolved in a mixed  
28 solvent ( $V_{\text{H}_2\text{O}}:V_{\text{ethanol}} = 2:1$ ) at a mole ratio of La<sup>3+</sup>:Co<sup>2+</sup>:CA equal to 1:1:2 and a La<sup>3+</sup>  
29 concentration of 10 mmol L<sup>-1</sup>. The solution was stirred for 30 min, sonicated for 10  
30 min at room temperature, and dried in a vacuum oven at 90 °C. To obtain crystallized  
31 LaCoO<sub>3</sub>, the precursor was calcined at 500, 600, 700, 800, 900, and 1000 °C for 5 h  
32 with a heating rate of 5 °C min<sup>-1</sup>. The obtained solid was ground, sieved to 40-60  
33 mesh, and labeled as LCO-T, where T was the calcination temperature. The sample  
34 calcinated at 500 °C shows a low crystalline perovskite phase (Fig. S1).

35

#### 36 *Catalyst characterization*

37 Powder X-ray diffraction (PXRD) patterns were recorded between 20° and 80° (2θ)  
38 at a step of 1° min<sup>-1</sup> on a Bruker D8 advance diffractometer with Cu Kα radiation (40  
39 kV and 40 mA). The crystalline size was determined using Scherrer's equation. The  
40 transmission electron micrograph (TEM) and electron energy loss spectroscopy  
41 (EELS) analyses were performed on a FEI Talos F200S with a spherical aberration  
42 corrector. All the particles were dispersed in ethanol on a carbon-coated copper grid.  
43 Specific surface area (SSA) measurements were carried out by the BET method based  
44 on N<sub>2</sub> physisorption capacity at 77 K on a Micromeritics ASAP 2020 instrument.

45 Fourier transform infrared spectra (FTIR) were recorded on a Bruker Vector 70  
46 spectrometer using KBr as the substrate.

47 The H<sub>2</sub> temperature programmed reduction (H<sub>2</sub>-TPR) and temperature programmed  
48 desorption of oxygen (O<sub>2</sub>-TPD) were carried out on a Beijing Builder PCA-1200  
49 chemisorption instrument equipped with a TCD detector. All the flow rates were set at  
50 30 mL min<sup>-1</sup>. H<sub>2</sub>-TPR was evaluated in the range of 30-900 °C at a heating rate of 10  
51 °C min<sup>-1</sup>. The 100.0 mg sample was preheated at 250 °C under Ar for 30 min. O<sub>2</sub>-  
52 TPD was evaluated in the range of 40-800 °C at a heating rate of 10 °C min<sup>-1</sup> under  
53 He flow. 100.0 mg sample was pretreated at 250 °C for 1 h and cooled to 40 °C under  
54 O<sub>2</sub>.

55 The temperature programmed reduction of toluene (toluene-TPR) and temperature  
56 programmed desorption of toluene (toluene-TPD) were performed on a laboratory-  
57 made apparatus. For toluene-TPR, 50.0 mg sample after pretreatment by N<sub>2</sub> at 150 °C  
58 was flowed through by 50 mL min<sup>-1</sup> of 500 ppm/N<sub>2</sub>, where the temperature was raised  
59 from 30 to 550 °C with a rate of 5 °C min<sup>-1</sup>. For toluene-TPD, 50.0 mg sample was  
60 purged under Ar atmosphere at 100 °C for 1 h. After cooling to room temperature, 50  
61 mL min<sup>-1</sup> of 500 ppm/air was introduced until adsorption saturation. Then, the sample  
62 was purged under an N<sub>2</sub> flow to remove the weakly absorbed species. Finally, the  
63 temperature was increased at a rate of 5 °C min<sup>-1</sup> from 30 to 550 °C under 50 mL min<sup>-1</sup>  
64 of N<sub>2</sub>. The CO<sub>2</sub> concentration was online monitored by a non-dispersive infrared  
65 CO<sub>2</sub> analyzer. For LCO-800, LCO-900, and LCO-1000 catalysts, the amount of  
66 generated CO<sub>2</sub> was below the detection limit. In most cases, the signal of toluene (m/z

67 = 91 and 92) was too weak to be recognized by a mass spectrometer.

68 The temperature-dependent magnetization was measured in a SQUID-VSM system  
69 at a magnetic field of 500 Oe in the temperature range of 5-300 K under field cooling  
70 conditions. Based on the magnetization results, the  $e_g$  occupancy of Co cations in  
71 LCO-T samples was calculated (Text S1). The core level spectra and valence band  
72 (VB) spectra of the samples were investigated by XPS using a Thermo Fisher K-  
73 Alpha instrument equipped with an Al  $K\alpha$  source ( $h\nu=1486.6$  eV). The pass energy  
74 for the full spectrum was 50 eV, while the pass energy for the spectra of a single  
75 element and valence band was 30 eV. The charge shift was corrected by adjusting the  
76 binding energy of C 1s to 284.8 eV. The O p-band center relative to  $E_F$  can be  
77 obtained by VB spectra through Gaussian-Lorentzian fitting (Text S2). All the spectra  
78 were subtracted with a Shirley-type background.

79

### 80 *Toluene oxidation*

81 The catalytic oxidation of toluene by LCO-T was performed in a conventional  
82 fixed-bed reactor in the temperature range of 100-400 °C under atmospheric pressure.  
83 100.0 mg of catalyst was loaded in a quartz tube reactor (i.d. = 6 mm) supported by a  
84 porous quartz plate. Gaseous toluene was generated by flowing  $N_2$  into liquid toluene  
85 at 0 °C. The inlet gas was composed of 500 ppm toluene and 20 vol% oxygen  
86 balanced by  $N_2$ . The total flow rate was 100 mL  $min^{-1}$ , corresponding to a gas hourly  
87 space velocity (GHSV) of 60 000  $cm^3 g^{-1} h^{-1}$ . The toluene oxidation efficiency was  
88 expressed by the  $CO_2$  generation efficiency (Eq. (1)):

89 
$$\text{CO}_2 \text{ generation efficiency} = C_{\text{CO}_2}/C^*_{\text{CO}_2} \times 100\% \quad (1)$$

90 where  $C_{\text{CO}_2}$  and  $C^*_{\text{CO}_2}$  are the  $\text{CO}_2$  concentrations in the effluent at different

91 temperatures and those when toluene was completely oxidized to  $\text{CO}_2$ , respectively.

92 The concentration of  $\text{CO}_2$  in the effluent was analyzed online by a non-dispersive

93 infrared  $\text{CO}_2$  analyzer (Beijing Huayun GXH-3010E).

94

- 95 **Text captions**
- 96 **Text S1.** Comparison of the technologies for VOC abatement.
- 97 **Text S2.** Results and discussion of EELS spectra.
- 98 **Text S3.** Calculation details of  $e_g$  occupancy.
- 99 **Text S4.** Calculation details of O p band center relative to the  $E_F$ .
- 100 **Text S5.** Calculation details of apparent activation energy.
- 101 **Text S6.** Comparison of the catalytic activity of reported cobalt-related catalysts  
102 towards toluene oxidation.
- 103 **Text S7.** Calculation details of specific reaction rate.
- 104

105 **Text S1.** Comparison of the technologies for VOC abatement.

106 Among the destructive technologies for VOC abatement, thermal incineration and  
107 catalytic oxidation are two common routes for the removal of VOCs with medium-  
108 high concentration ( $> 5000 \text{ mg m}^{-3}$ ).<sup>2, 3</sup> Conventional thermal incineration can  
109 completely destruct high concentration of VOCs at the temperature as high as 800–  
110 1200 °C, while catalytic oxidation is typically operated at lower temperature (200–  
111 500 °C or even lower) with less formation of dioxins and noxious products, and is  
112 more energy-efficient.<sup>4</sup>

113 Compared to destruction methods, non-destructive methods including adsorption  
114 and condensation have their own advantages and disadvantages.<sup>5</sup> Absorption is widely  
115 used as a mature method to effectually remove high concentration of water-soluble  
116 VOCs,<sup>6</sup> but usually comes with the challenges for the subsequent treatment of spent  
117 solvent and high cost for maintenance. Condensation can recover VOCs in quantity  
118 through transforming them into liquid at lower temperature or higher pressure.<sup>7</sup>  
119 Nonetheless, due to the high processing cost, condensation usually deals with the  
120 valuable VOCs at high concentration,<sup>8</sup> and is limited by the disposal of spent coolant  
121 during the condensation process.<sup>9</sup>

122

123 **Text S2.** Results and discussion of EELS spectra.

124 According to the XPS analysis, the valence of surface Co is +3. To investigate the  
125 valence of Co in the bulk of LCO-T, the electron energy loss spectroscopy (EELS)  
126 was performed under STEM condition. Figs. 1d and S6 shows the EELS spectra at Co  
127 L-edges from the center to the edge of LCO-T nanoparticle, which is sensitive to the  
128 electronic structure from the bulk and the surface. The EELS spectra display two  
129 peaks at ca. 780.4 and 795.4 eV, attributed to the  $L_3$  and  $L_2$  peaks in Co L-edges,  
130 respectively. For Co  $L_{2,3}$ -edges which originate from the excitations from the inner 2p  
131 to unoccupied 3d orbitals, the energy onset of  $L_3$  peak and the white-line intensity  
132 ratio ( $I_3/I_2$ , where the  $I_2$  and  $I_3$  are the integrated intensity of  $L_2$  and  $L_3$  peaks) are  
133 sensitive to the oxidation state. Co  $L_{2,3}$ -edges taken from the surface region are similar  
134 to those from the center region, including peak intensities and energies. And no  
135 noticeable change in the  $I_3/I_2$  ratio between the bulk and surface is found. Thus, the  
136 oxidation state of Co is +3 in LCO-T (Lines 103-117).<sup>10-13</sup>

137



138 **Text S3.** Calculation details of  $e_g$  occupancy.

139 Based on the magnetization curves, the temperature-dependent susceptibility ( $\chi$ )  
140 was calculated by Eq. (2).

$$141 \quad \chi = M/H \quad (2)$$

142 where  $M$  is the temperature-dependent magnetization (Fig. S5.a) and  $H$  is the  
143 magnetic field strength, i.e., 500 Oe. Based on the Curie-Weiss law (Eq. (3)), the  
144 Curie constant ( $C$ ) of LCO-T samples can be obtained from the slope of the straight  
145 lines above the paramagnetic transition temperatures ( $\Theta$ ) by plotting  $\chi^{-1}$  as a function  
146 of temperature  $T$  through regression (Fig. S5b, Table 2).

$$147 \quad \chi^{-1} = (T - \Theta)/C \quad (3)$$

148 According to Langevin theory, the Curie constant ( $C$ ) is correlated with the  
149 Boltzmann constant ( $k_B$ ,  $1.38 \times 10^{-23}$  J/K), Avogadro number ( $N_A$ ,  $6.02 \times 10^{23}$ /mol),  
150 Bohr magneton ( $\mu_B$ ,  $9.27 \times 10^{-24}$  J/T), Lande factor ( $g$ ) and total angular momentum  
151 quantum number ( $J$ ) (Eq. (4)). As  $k_B$ ,  $N_A$ , and  $\mu_B$  are constant, Eq. (4) can be changed  
152 to Eq. (5).

$$153 \quad C = N_A g^2 \mu_B^2 J(J+1) / 3k_B \quad (4)$$

$$154 \quad 8C = g^2 J(J+1) \quad (5)$$

155 Combined with the Quantum theory (Eq. (6)), Eq. (5) can be changed to Eq. (7).  
156 The effective magnetic moments ( $\mu_{\text{eff}}$  with  $\mu_B$  as a unit) can be calculated and are  
157 shown in Table 2.

$$158 \quad \mu_{\text{eff}}^2 = g^2 J(J+1) \mu_B^2 \quad (6)$$

$$159 \quad \mu_{\text{eff}}^2 = 8C \mu_B^2 \quad (7)$$

160 Based on the theory of paramagnetism (Eq. (8)), the volume fractions of metals in  
161 HS and LS states can be calculated (Table S2), from which the  $e_g$  value can be  
162 obtained (Eqs. (9)-(10), Table 2).<sup>14, 15</sup>

$$163 \quad \mu_{\text{eff}} = g\mu_B(S_{\text{HS}}(S_{\text{HS}}+1)V_{\text{HS}} + S_{\text{LS}}(S_{\text{LS}}+1)V_{\text{LS}})^{1/2} \quad (8)$$

$$164 \quad V_{\text{HS}} + V_{\text{LS}} = 1 \quad (9)$$

$$165 \quad x = 2V_{\text{HS}} \quad (10)$$

166 where  $S_{\text{HS}}$  and  $S_{\text{LS}}$  are  $S$  values equal to 2 and 0, respectively, and  $V_{\text{HS}}$  and  $V_{\text{LS}}$  are  
167 the volume fractions in HS and LS states, respectively.

168

169 **Text S4.** Calculation details of O p band center relative to the  $E_F$ .

170 VB spectra were fitted by Gaussian-Lorentzian and corrected by background using  
171 the Shirley approach. After background subtraction, the asymmetrical VB spectra of  
172 LCO-T were deconvoluted into four symmetrical peaks of A, B, C, and D (Fig. 4).  
173 The peaks A, C, and D are attributed to the Co 3d state, while the peak B is mainly  
174 attributed to the O 2p state.<sup>15</sup> The O p-band center relative to the  $E_F$  can be calculated  
175 by Eq. (11).<sup>16, 17</sup>

$$O\ p - \text{band center} = \frac{\int_{-\infty}^{\infty} x\rho(x)dx}{\int_{-\infty}^{\infty} \rho(x)dx} \quad (11)$$

176 where  $x$  and  $\rho(x)$  are the energy and density of electron, respectively.

178

179 **Text S5.** Calculation details of apparent activation energy.

180 The reaction rate ( $r_s$ ,  $\mu\text{mol g}^{-1} \text{s}^{-1}$ ) was defined as the number of toluene molecules  
181 oxidized over the catalyst per gram per second (Eq. (12)).

$$182 \quad r_s = (C_{\text{toluene}} \times X_{\text{toluene}} \times V_{\text{gas}})/m \quad (12)$$

183 where  $m$  is the catalyst mass (g),  $C_{\text{toluene}}$  is the concentration of toluene in the gas  
184 mixture ( $\mu\text{mol mL}^{-1}$ ),  $X_{\text{toluene}}$  is the conversion of toluene (%), and  $V_{\text{gas}}$  is the total flow  
185 rate ( $\text{mL s}^{-1}$ ).

186 The apparent activation energy ( $E_a$ ,  $\text{kJ mol}^{-1}$ ) was evaluated by the Arrhenius  
187 equation (Eq. (13))<sup>18</sup>.

$$188 \quad r_s = A \exp(-E_a/RT) \quad (13)$$

189 where  $r_s$  is the reaction rate of toluene ( $\mu\text{mol g}^{-1} \text{s}^{-1}$ ),  $A$  is the pre-exponential factor,  
190  $R$  is the molar gas constant,  $8.314 \text{ J mol}^{-1} \text{ K}^{-1}$ .

191

192 **Text S6.** Comparison of the catalytic activity of reported cobalt-related catalysts  
193 towards toluene oxidation.

194 A comparison on catalytic activity of the as-obtained typical sample has been made  
195 with those of the related catalysts reported in the literatures. Under identical reaction  
196 condition, LCO-700 is compared to the previously reported cobalt-related catalysts in  
197 toluene oxidation. LCO-700 exhibits better catalytic activity ( $T_{90} = 220\text{ }^{\circ}\text{C}$ ) than both  
198 spinel-type oxides (e.g.,  $\text{Co}_3\text{O}_4$  ( $T_{90} = 266\text{ }^{\circ}\text{C}$ ),<sup>19</sup>  $\text{CoMnO}$  ( $T_{90} = 311\text{ }^{\circ}\text{C}$ )<sup>20</sup> and  
199  $\text{CoAlO}$  ( $T_{90} = 319\text{ }^{\circ}\text{C}$ ),<sup>21</sup>) and perovskite-type oxides (e.g.,  $\text{La}_{0.6}\text{Sr}_{0.4}\text{Co}_{0.9}\text{Fe}_{0.1}\text{O}_3$   
200 ( $T_{90} = 239\text{ }^{\circ}\text{C}$ ),<sup>22</sup>  $\text{LaCoO}_3/\text{SBA-15}$  ( $T_{90} = 310\text{ }^{\circ}\text{C}$ )<sup>23</sup> and  $\text{Co}_3\text{O}_4/3\text{DOM}$   
201  $\text{La}_{0.6}\text{Sr}_{0.4}\text{CoO}_3$  ( $T_{90} = 227\text{ }^{\circ}\text{C}$ )).<sup>24</sup>

202

203 **Text S7.** Calculation details of specific reaction rate.

204 The specific reaction rate ( $R_s$ ,  $\mu\text{mol s}^{-1} \text{m}^{-2}$ ) of LCO-T catalysts was defined as the  
205 number of toluene molecules oxidized over the catalyst per second per square meter  
206 (Eq. (14)).

$$207 \quad R_s = C_{\text{toluene}} \times X_{\text{toluene}} \times V_{\text{gas}} / (S \times m) \quad (14)$$

208 where  $m$  is the catalyst mass (g),  $C_{\text{toluene}}$  is the concentration of toluene in the gas  
209 mixture ( $\mu\text{mol mL}^{-1}$ ),  $X_{\text{toluene}}$  is the conversion of toluene (%) over LCO-T at 200 °C,  
210  $V_{\text{gas}}$  is the total flow rate ( $\text{mL s}^{-1}$ ) and  $S$  is the specific surface area ( $\text{m}^2 \text{g}^{-1}$ ).

211

212 **Table captions**

213 **Table S1.** Lattice parameters, crystal size, particle size and specific surface area (SSA)  
214 of LCO-T samples.

215 **Table S2.** Effective magnetic moment ( $\mu_{\text{eff}}$ ) and  $e_g$  orbital occupation for different  
216 spin states of  $\text{Co}^{3+}$  ions in LCO-T samples.

217 **Table S3.** Temperatures for 50% and 90% toluene conversion, apparent activation  
218 energies ( $E_a$ ) and SSA-normalized reaction rate over LCO-T catalysts.

219

220 **Table S1.** Lattice parameters, crystal size, particle size and specific surface area (SSA)

221 of LCO-T samples.

| Samples  | $a_0=b_0/\text{\AA}$ | $c_0/\text{\AA}$ | $V/\text{\AA}^3$ | crystallite<br>size/nm | particle<br>size/nm | SSA/m <sup>2</sup> g <sup>-1</sup> |
|----------|----------------------|------------------|------------------|------------------------|---------------------|------------------------------------|
| LCO-600  | 5.423                | 13.146           | 334.76           | 21                     | 29                  | 10.4                               |
| LCO-700  | 5.435                | 13.114           | 335.50           | 21                     | 24                  | 7.5                                |
| LCO-800  | 5.438                | 13.121           | 336.08           | 23                     | 34                  | 3.8                                |
| LCO-900  | 5.424                | 13.206           | 336.42           | 35                     | 52                  | 1.6                                |
| LCO-1000 | 5.423                | 13.211           | 336.53           | 81                     | 512                 | 1.4                                |



223 **Table S2.** Effective magnetic moment ( $\mu_{\text{eff}}$ ) and  $e_g$  orbital occupation for different  
 224 spin states of  $\text{Co}^{3+}$  ions in LCO-T samples.

| Samples  | $C/$                                          | $\mu_{\text{eff}}/$ | high spin state | low spin state | $e_g$ |
|----------|-----------------------------------------------|---------------------|-----------------|----------------|-------|
|          | $\text{emu}\cdot\text{K}\cdot\text{mol}^{-1}$ | $\mu_B$             | percentage      | percentage     |       |
| LCO-600  | 1.46                                          | 3.42                | 46%             | 54%            | 0.92  |
| LCO-700  | 1.51                                          | 3.48                | 50%             | 50%            | 1.00  |
| LCO-800  | 1.98                                          | 3.98                | 66%             | 34%            | 1.32  |
| LCO-900  | 2.18                                          | 4.18                | 73%             | 27%            | 1.46  |
| LCO-1000 | 2.83                                          | 4.76                | 94%             | 6%             | 1.89  |

226 **Table S3.** Temperatures for 50% and 90% toluene conversion, apparent activation  
 227 energies ( $E_a$ ) and SSA-normalized reaction rate over LCO-T catalysts.

| Sample   | Toluene oxidation activity |                     | $E_a/$<br>kJ mol <sup>-1</sup> | SSA-normalized reaction rate<br>( $R_s$ )/ $\mu\text{mol s}^{-1} \text{m}^{-2}$ |
|----------|----------------------------|---------------------|--------------------------------|---------------------------------------------------------------------------------|
|          | T <sub>50</sub> /°C        | T <sub>90</sub> /°C |                                |                                                                                 |
| LCO-600  | 213                        | 223                 | 50                             | 0.358                                                                           |
| LCO-700  | 211                        | 220                 | 49                             | 0.404                                                                           |
| LCO-800  | 216                        | 240                 | 55                             | 0.345                                                                           |
| LCO-900  | 223                        | 250                 | 61                             | 0.309                                                                           |
| LCO-1000 | 259                        | 335                 | 73                             | 0.236                                                                           |

228

229 **Figure captions**

230 **Fig. S1** XRD patterns for LCO-T catalysts and the standard card (JCPDS: 25-1060) of  
231 hexagonal  $\text{LaCoO}_3$  perovskite.

232 **Fig. S2** XRD pattern for LCO-500 sample and the standard card (JCPDS: 25-1060) of  
233 hexagonal  $\text{LaCoO}_3$  perovskite.

234 **Fig. S3** Element mapping (a), and EDS spectra images (b) of LCO-700, and TEM  
235 images and size distribution of LCO-600 (c), LCO-800 (d), LCO -900 (e), and LCO-  
236 1000 (f).

237 **Fig. S4** Survey XPS spectra of LCO-T samples.

238 **Fig. S5** Co 2p XPS spectra of LCO-T samples.

239 **Fig. S6** EELS spectra of Co L-edges of LCO-600 (a), LCO-800 (b), LCO-900 (c), and  
240 LCO-1000 (d).

241 **Fig. S7** EELS spectra of La M-edges of LCO-700.

242 **Fig. S8** Temperature dependent magnetization (a) and temperature dependent of  
243 susceptibilities (b) under  $H = 500$  Oe for LCO-T samples.

244 **Fig. S9** Catalytic stability of LCO-700 at 250 °C. Reaction conditions: [toluene] = 500  
245 ppm,  $[\text{O}_2] = 20\%$ , catalyst mass = 100 mg, total flow rate = 100 mL  $\text{min}^{-1}$ , and GHSV  
246 = 60000  $\text{cm}^3 \text{g}^{-1} \text{h}^{-1}$ .

247 **Fig. S10** O 2p XPS spectra of LCO-T catalysts.

248 **Fig. S11**  $\text{O}_2$ -TPD profiles of LCO-T catalysts (a), toluene-TPD profiles of LCO-600  
249 and LCO-700 (b), and  $\text{H}_2$ -TPR (c) and toluene-TPSR profiles (d) of LCO-T catalysts.

250 **Fig. S12** Relationship between  $e_g$  filling and O p-band center relative to the  $E_F$  of

251 LCO-T catalysts.

252

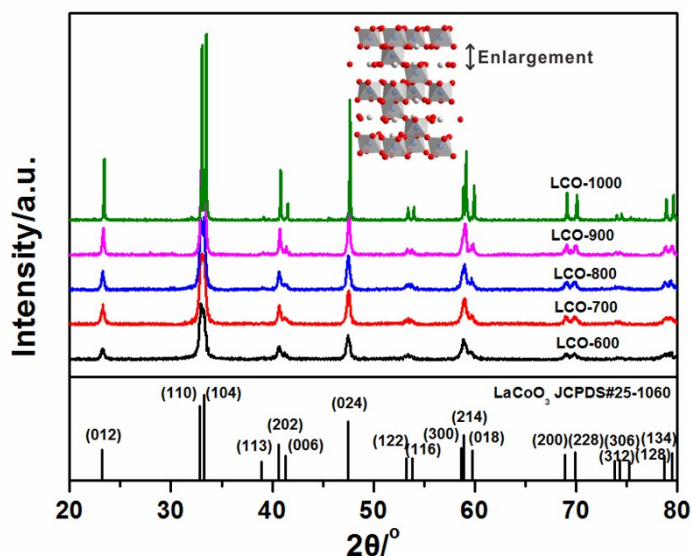

253

254 **Fig. S1** XRD patterns for LCO-T catalysts and the standard card (JCPDS: 25-1060) of hexagonal  
 255 LaCoO<sub>3</sub> perovskite.

256 The XRD patterns of LCO-T well correspond to the standard card of hexagonal  
 257 LaCoO<sub>3</sub> (JCPDS: 25-1060), with diffractions of (012), (110), (104), (202), (006),  
 258 (024), (122), (116), (300), (214), (018), (200), and (228) planes at  $2\theta$  of 23.2°, 33.0°,  
 259 33.4°, 40.7°, 41.4°, 47.6°, 53.2°, 53.8°, 59.0°, 59.9°, 69.2°, and 70.2°, respectively  
 260 (Fig. S1).<sup>25</sup> Apart from perovskite-type LaCoO<sub>3</sub>, calcinations at 600-1000 °C do not  
 261 yield any other phases, e.g., Co<sub>3</sub>O<sub>4</sub> and La<sub>2</sub>O<sub>3</sub>. However, calcinations at higher  
 262 temperature inevitably improves the crystallinity, as the diffraction patterns become  
 263 more intense. The crystallite size increases from 21 nm (LCO-600) to 512 nm (LCO-  
 264 1000). In terms of lattice parameter, the  $a_0$  and  $b_0$  vary slightly with the calcination  
 265 temperature, but the  $c_0$  increases significantly at higher calcination temperature. This  
 266 suggests the expansion of unit cell of LaCoO<sub>3</sub>.

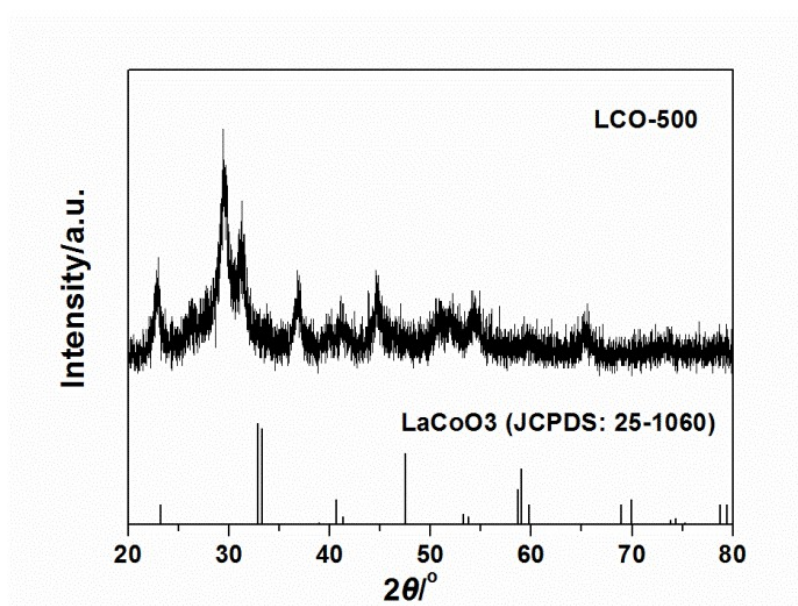

268

269 **Fig. S2** XRD pattern for LCO-500 sample and the standard card (JCPDS: 25-1060) of hexagonal

270

LaCoO<sub>3</sub> perovskite.

271 The sample calcinated at 500 °C shows a perovskite phase with low-crystalline (Fig.

272 S2). Furthermore, apart from LaCoO<sub>3</sub> perovskite, impure phases, e.g. Co<sub>3</sub>O<sub>4</sub> and

273 La<sub>2</sub>O<sub>3</sub> appear.

274

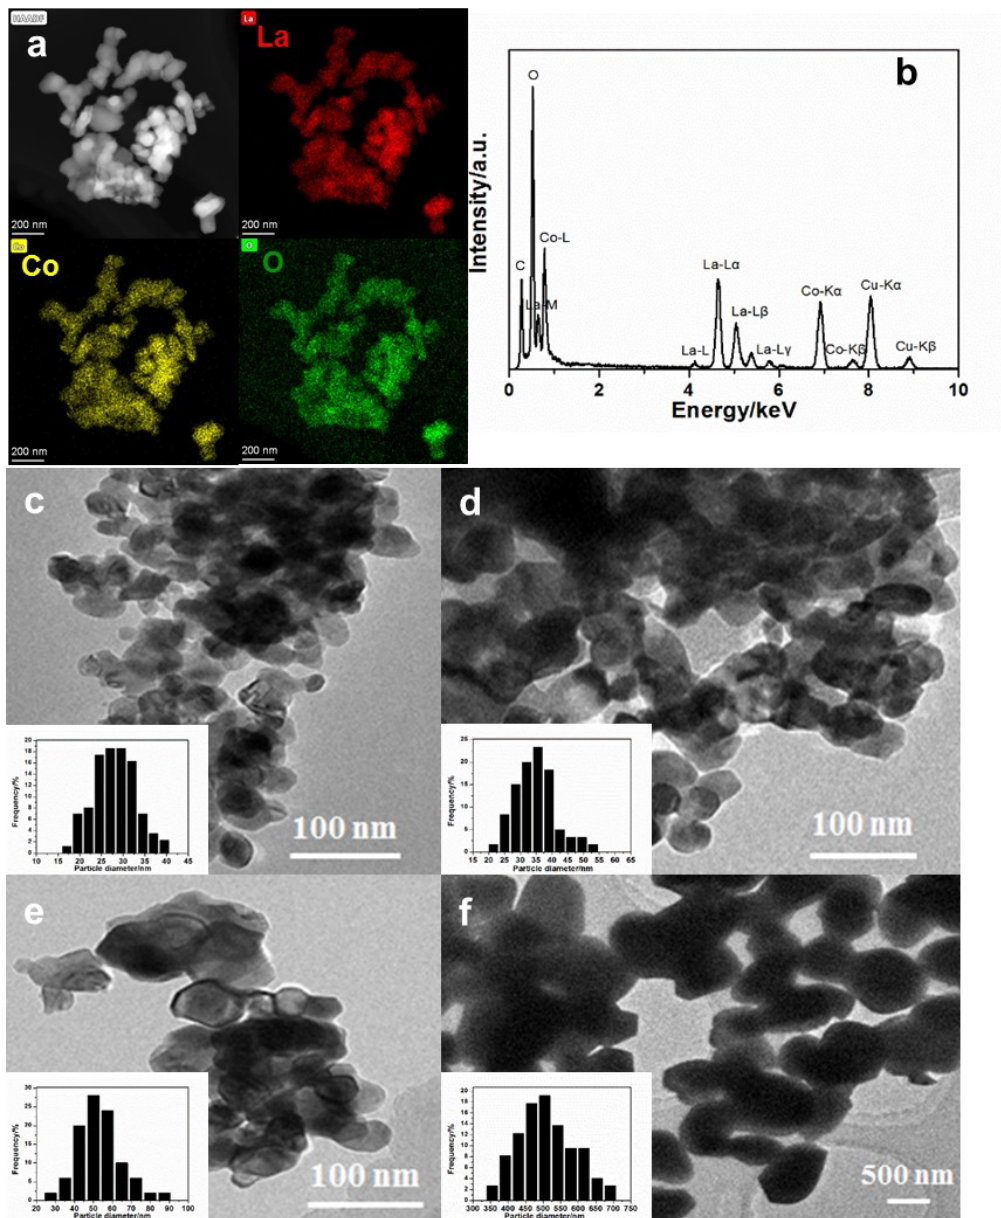

275

276 **Fig. S3** Element mapping (a), and EDS spectrum image (b) of LCO-700, and TEM images and

277 size distribution of LCO-600 (c), LCO-800 (d), LCO -900 (e), and LCO-1000 (f).

278 The EDS mapping indicates the uniform dispersion of La, Co, and O in LCO-700,

279 with a La:Co atomic ratio of 1 (Fig. S3a-b). TEM images display that all the LCO-T

280 samples exhibit many spherical particles interwoven together (Fig. S3c-f). The

281 particle sizes of LCO-600, LCO-800, LCO-900, and LCO-1000 are 29, 34, 52, and

282 511 nm, respectively.

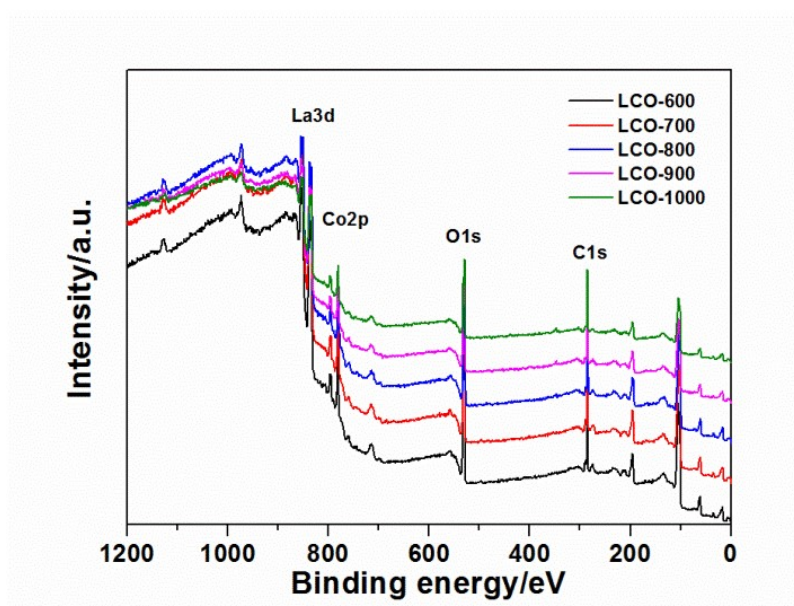

283

284

**Fig. S4** Survey XPS spectra of LCO-T samples.

285 The XPS full-range spectra of LCO-T reveal the presence of La (10.42 at. %), Co  
286 (10.32 at. %), and O (79.28 at. %) on the surface (Fig. S4). The La:Co atomic ratio is  
287 1, which is in accord with the EDS mapping analysis results. This indicates the same  
288 surface chemical composition in LCO-T.



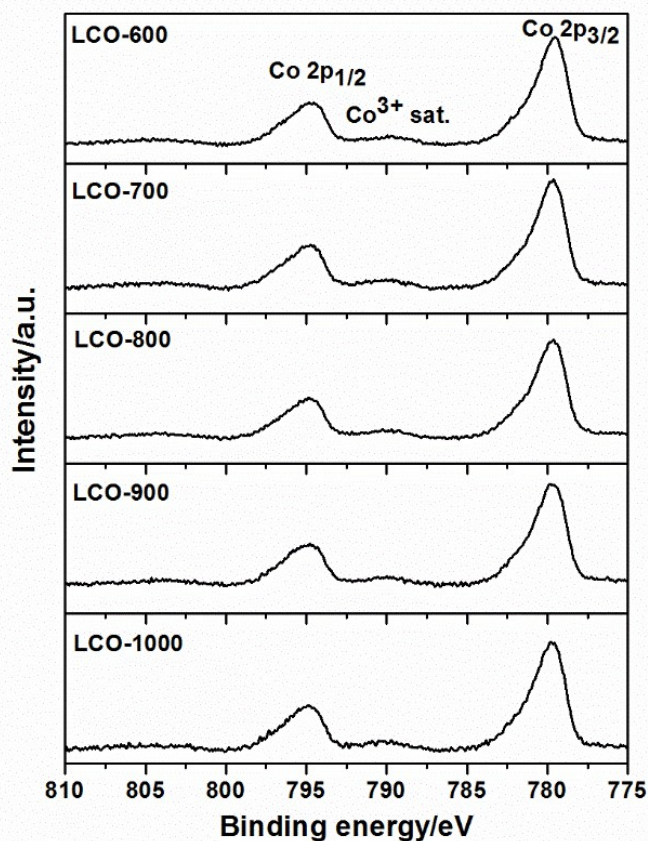

290

291

**Fig. S5** Co 2p XPS spectra of LCO-T samples.

292 The Co 2p spectra are composed of Co 2p<sub>3/2</sub>, Co 2p<sub>1/2</sub>, and satellite peaks at 779.8,

293 795.0, and 790.0 eV, respectively (Fig. S5). The binding energy of Co 2p<sub>3/2</sub> reveals

294 that the valence of surface Co is +3.<sup>26,27</sup> The XPS results illustrate that all the LCO-T

295 catalysts have the same Co valence on the surface.

296

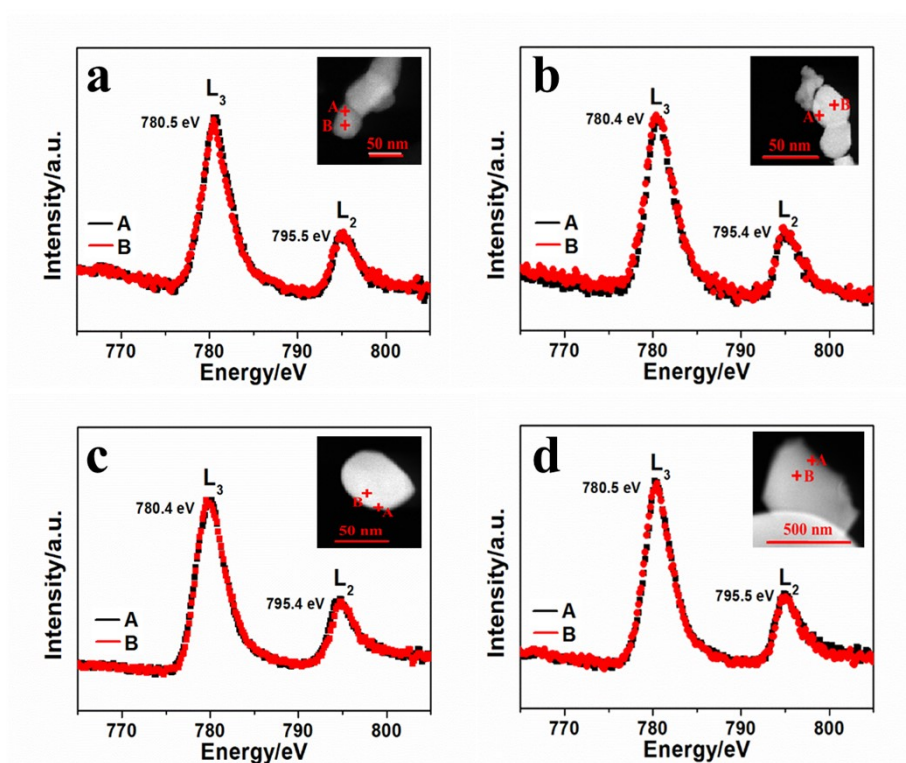

298

299 **Fig. S6** EELS spectra of Co L-edges of LCO-600 (a), LCO-800 (b), LCO-900 (c), and LCO-1000  
300 (d).

301 For all the LCO-T samples, Co  $L_{2,3}$ -edges taken from the surface region are similar  
302 to those from the bulk region, including peak intensities and energy positions.  
303 Moreover, no noticeable change in the  $I_3/I_2$  ratio between the bulk and surface is  
304 found (Fig. S6). Thus, the oxidation state of Co is +3 in LCO-T (Lines 103-111).<sup>12-14</sup>

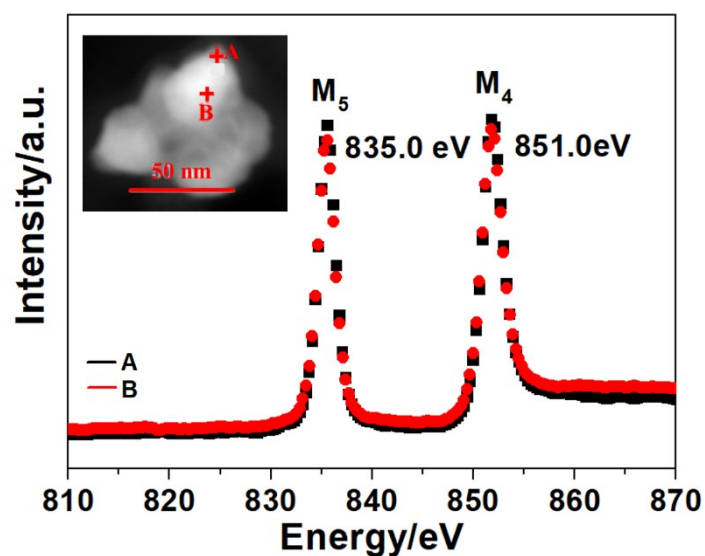

305

306

Fig. S7 EELS spectra of La M-edges of LCO-700.

307 The valence of La in LCO-T is also investigated by EELS spectra. Fig. R2 shows  
 308 the EELS spectra at La M-edges from the bulk to the edge of LCO-700 nanoparticle.

309 The EELS spectra display two peaks at ca. 835.0 and 851.0 eV, corresponding to the  
 310 3d to 4f transitions of the M<sub>5</sub> and M<sub>4</sub>-edges.<sup>28</sup> La M<sub>4,5</sub>-edges taken from the surface

311 region are similar to those from the center region, including peak intensities and  
 312 energy positions. The EELS spectra of La M<sub>4,5</sub>-edges also prove that La is +3 in LCO-

313 T (Fig. S7).<sup>29-31</sup>

314

315

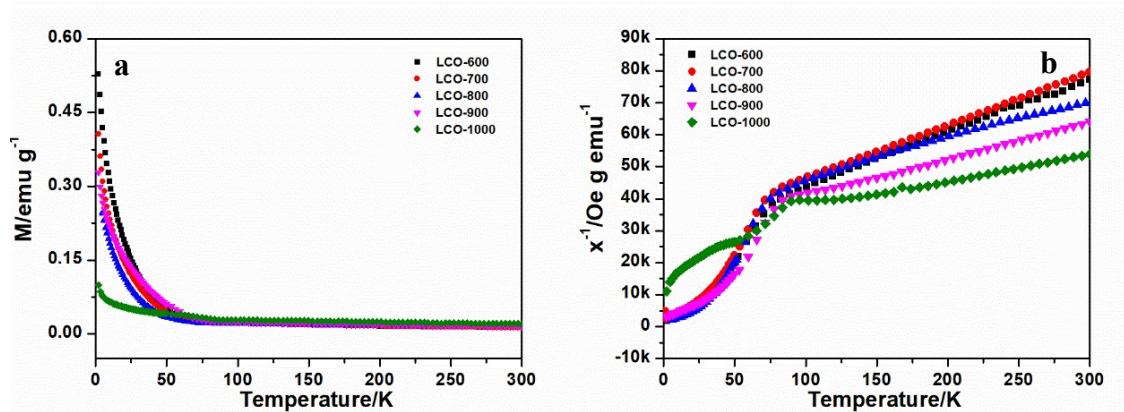

316 **Fig. S8** Temperature dependent magnetization (a) and temperature dependent of susceptibilities (b)

317 under  $H = 500$  Oe for LCO-T samples.

318 The composition of spin states can be indexed by  $e_g$  orbital filling. The number of  
 319  $e_g$  orbital fillings increases with the HS proportion. In Fig. S8, the effective magnetic  
 320 moment  $\mu_{\text{eff}}$  can be calculated by  $\mu_{\text{eff}} = (8C)^{1/2}\mu_B$  (Text S2). For LCO-700, the  
 321 calculated  $\mu_{\text{eff}}$  of  $3.48 \mu_B$  is consistent with the values reported for  $\text{LaCoO}_3$ ,  
 322 corresponding to the  $\text{Co}^{3+}$  ions of half HS and half LS states.<sup>32, 33</sup> The calculated  $\mu_{\text{eff}}$   
 323 values of LCO-600, LCO-800, LCO-900, and LCO-1000 are 3.42, 3.98, 4.18, and  
 324  $4.76 \mu_B$ , respectively. The increase in  $\mu_{\text{eff}}$  with calcination temperature is a distinctive  
 325 feature of cobaltite, owing to the strong interdependence between Co-Co interactions  
 326 and the Co spin state.<sup>33</sup> The  $e_g$  values of LCO-600, LCO-700, LCO-800, LCO-900,  
 327 and LCO-1000 are 0.92, 1.00, 1.32, 1.46, and 1.89, respectively (Table 2).  
 328 Consequently, the unit cell expansion of LCO-T (from  $334.76$  to  $336.53 \text{ \AA}^3$ ) can be  
 329 explained by the increasing population of HS states, ascribed to the larger radii of  
 330  $\text{Co}^{3+}$  with HS ( $0.610 \text{ \AA}$ ) than that of  $\text{Co}^{3+}$  with LS ( $0.545 \text{ \AA}$ ).<sup>34</sup>

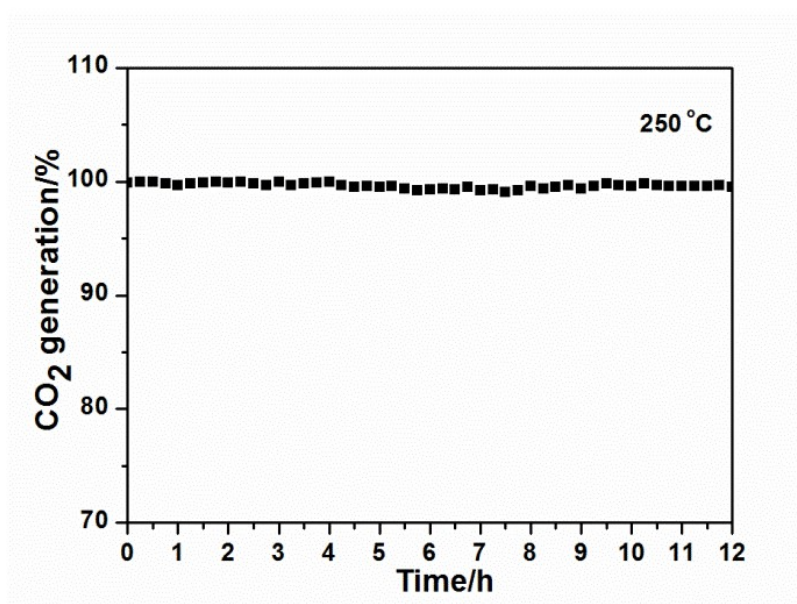

331

332 **Fig. S9** Catalytic stability of LCO-700 at 250 °C. Reaction conditions: [toluene] = 500 ppm, [O<sub>2</sub>]

333 = 20%, catalyst mass = 100 mg, total flow rate = 100 mL min<sup>-1</sup>, and GHSV = 60000 cm<sup>3</sup> g<sup>-1</sup> h<sup>-1</sup>.

334 LCO-700 shows high stability in the catalytic oxidation of toluene at 250 °C for 12

335 h (Fig. S9).

336

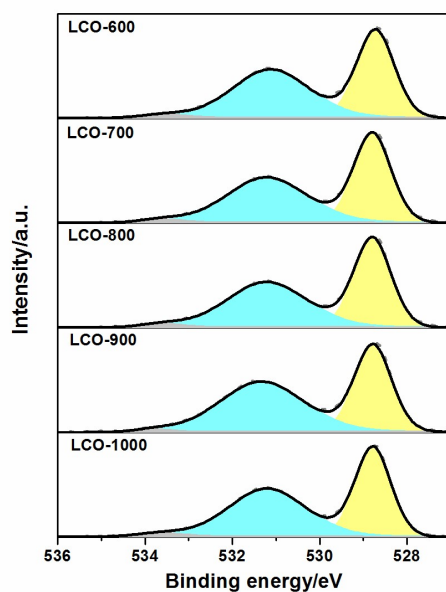

337

338

**Fig. S10** O 2p XPS spectra of LCO-T catalysts.

339 Oxygen species are vital in the VOC oxidation over transition metal oxides.<sup>1</sup> The

340 O 1s XPS spectra of LCO-T display a two-band curve (Fig. S10). The spectra are

341 deconvoluted into three contributions at 528.6, 531.1, and 533.1 eV, attributed to

342 lattice oxygen ( $O_{\text{lat}}$ ), surface adsorbed oxygen ( $O_{\text{ads}}$ ), and adsorbed water, respectively.

343 The electrophilic  $O_{\text{ads}}$  including  $O^2$ ,  $O_2^{2-}$  or  $O^-$ ,<sup>35</sup> can attack organic molecules in the

344 region of high electron density, leading to the destruction and deep oxidation of the

345 carbon skeleton. Thus, the electrophilic oxygen species on the surface of LCO-T

346 catalysts are responsible for the total oxidation of toluene.<sup>25</sup> For LCO-T, the  $O_{\text{ads}}/O_{\text{lat}}$

347 ratio decreases in the following order: LCO-700 (1.41) > LCO-600 (1.38) > LCO-800

348 (1.30) > LCO-900 (1.24) > LCO-1000 (1.17). The  $O_{\text{ads}}/O_{\text{lat}}$  ratio displays a good

349 positive relationship with the SSA-normalized reaction rate  $R_s$  ( $R^2 = 0.97$ ) (Fig. 4a).

350 This consolidates the vital role of surface oxygen in the catalytic oxidation of toluene

351 over LCO-T catalysts.

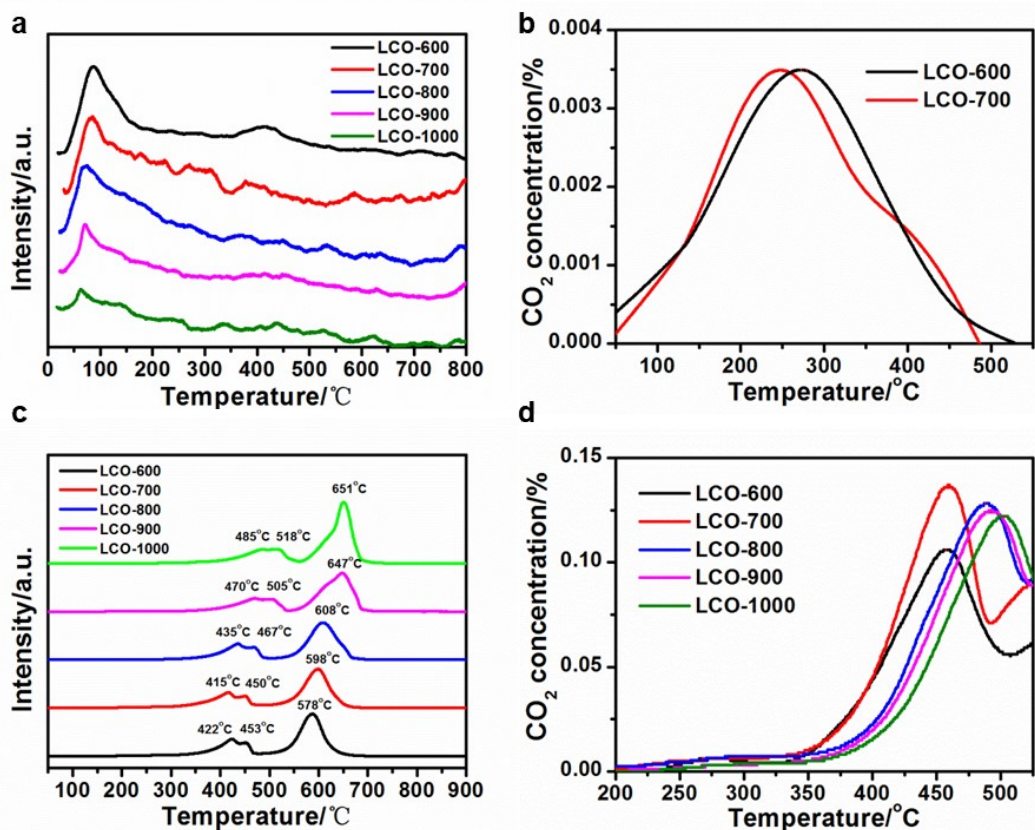

352

353 **Fig. S11** O<sub>2</sub>-TPD profiles of LCO-T catalysts (a), toluene-TPD profiles of LCO-600 and LCO-700

354

(b), and H<sub>2</sub>-TPR (c) and toluene-TPSR profiles (d) of LCO-T catalysts.

355 The mobility of surface oxygen affects the formation of oxygen vacancies and the

356 refilling by gaseous oxygen, which greatly determines the catalytic activity.<sup>36</sup> The

357 composition of oxygen species is investigated by O<sub>2</sub>-TPD (Fig. S11a). The peaks

358 below 250 °C are attributed to the desorption of adsorbed oxygen (O<sub>α</sub>), including O<sub>2</sub>,

359 O<sub>2</sub><sup>-</sup>, O<sub>2</sub><sup>2-</sup> or O<sup>-</sup>, while those in the range of 300-500 °C are attributed to the desorption

360 of labile lattice oxygen (O<sub>β</sub>).<sup>25</sup> The desorption amount of O<sub>α</sub> from LCO-T increases as

361 follows: LCO-1000 (1.2 μmol g<sup>-1</sup>) < LCO-900 (9.9 μmol g<sup>-1</sup>) < LCO-800 (21.7 μmol

362 g<sup>-1</sup>) < LCO-600 (24.6 μmol g<sup>-1</sup>) < LCO-700 (26.3 μmol g<sup>-1</sup>).

363 The CO<sub>2</sub> evolved in toluene-TPD is monitored. The LCO-700 evolves similar

364 amount of CO<sub>2</sub> to LCO-600, while the peak temperatures for LCO-600 and LCO-700

365 are 274 and 246 °C, respectively, close to the T90 (220-223 °C) in toluene oxidation  
366 (Fig. S11b). For LCO-800, LCO-900, and LCO-1000 catalysts, the amount of  
367 generated CO<sub>2</sub> was below the detection limit. As the temperature of O<sub>α</sub> desorption  
368 overlaps with that of toluene oxidation, O<sub>α</sub> is one of main oxygen species responsible  
369 for toluene oxidation.

370 The H<sub>2</sub>-TPR profiles of LaCoO<sub>3</sub> show two main peaks, which are originated from  
371 the reduction of Co<sup>3+</sup> to Co<sup>2+</sup> and Co<sup>2+</sup> to Co<sup>0</sup>, respectively (Fig. S11c). In the low  
372 temperature region from 300 to 550 °C, Co<sup>3+</sup> is reduced to Co<sup>2+</sup>. The second reduction  
373 peak from 550 to 650 °C is assigned to the reduction of Co<sup>2+</sup> to Co<sup>0</sup>. The reduction of  
374 Co<sup>3+</sup> to Co<sup>2+</sup> is involved in the oxidation of toluene rather than the reduction of Co<sup>2+</sup>  
375 to Co<sup>0</sup>. Thus, this study focused on the variation in the reduction peak at low-  
376 temperature region. The peak temperature of first reduction increases in the following  
377 order: LCO-700 (415 °C) < LCO-600 (422 °C) < LCO-800 (435 °C) < LCO-900 (470  
378 °C) < LCO-1000 (485 °C). This is consistent with the order of the catalytic activity.

379 The toluene-TPR is performed to reveal the reaction between toluene and lattice  
380 oxygen (Fig. S11d). The first reduction peak is assigned to the reduction of Co<sup>3+</sup> to  
381 Co<sup>2+</sup> by toluene, and the peak temperature for LCO-600, LCO-700, LCO-800, LCO-  
382 900, and LCO-1000 is 460, 456, 487, 493, and 505 °C, respectively. The H<sub>2</sub>-TPR and  
383 toluene-TPR results indicate that the O<sub>β</sub> is also involved in the oxidation of toluene,  
384 and the activity of O<sub>β</sub> decreases as follows: LCO-700 > LCO-600 > LCO-800 > LCO-  
385 900 > LCO-1000.



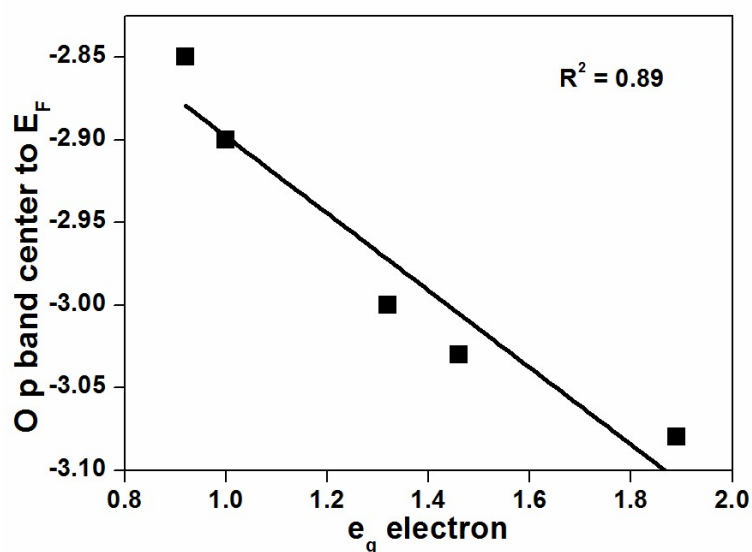

386

387 **Fig. S12** Relationship between  $e_g$  filling and O p-band center relative to the  $E_F$  of LCO-T catalysts.

388 The relationship between  $e_g$  filling and the O p-band center relative to the  $E_F$  shows

389 a good linear relationship ( $R^2 = 0.89$ , Fig. S12). Because the  $e_g$  filling determines the

390 oxygen adsorption strength on Co sites, it affects the oxygen adsorption and

391 desorption.<sup>37</sup> These processes are also constrained by the O p-band center relative to

392 the  $E_F$ . Specifically, for LCO-600, oxygen desorption would be suppressed, because

393 the O p-band center is too close to  $E_F$ . By contrast, for LCO-1000, the O p-band

394 center is too far from the  $E_F$ ; thus, the oxygen adsorption is difficult, inhibiting the

395 surface oxygen refilling.

396

397 **References**

- 398 1. N. A. Merino, B. P. Barbero, P. Ruiz and L. E. Cadus, *J. Catal.*, 2006, **240**,  
399 245-257.
- 400 2. C. T. Yang, G. Miao, Y. H. Pi, Q. B. Xia, J. L. Wu, Z. Li and J. Xiao, *Chem.*  
401 *Eng. J.*, 2019, **370**, 1128-1153.
- 402 3. K. Everaert and J. Baeyens, *J. Hazard. Mater.*, 2004, **109**, 113-139.
- 403 4. Z. X. Zhang, J. Zheng and W. F. Shangguan, *Catal. Today*, 2016, **264**, 270-  
404 278.
- 405 5. **Youn-Suk Son, *Chem. Eng. J.*, 2017, **316**, 609-622.**
- 406 6. F. Heymes, P. Manno-Demoustier, F. Charbit, J. L. Fanlo and P. Moulin,  
407 *Chem. Eng. J.*, 2006, **115**, 225-231.
- 408 7. F. I. Khan and A. K. Ghoshal, *J. Loss Prevent. Proc. Indust.*, 2000, **13**, 527-  
409 545.
- 410 8. P. Dwivedi, V. Gaur, A. Sharma and N. Verma, *Sep. Purif. Technol.*, 2004, **39**,  
411 23-37.
- 412 9. M. S. Kamal, S. A. Razzak and M. M. Hossain, *Atmos. Environ.*, 2016, **140**,  
413 117-134.
- 414 10. R. F. Klie, J. C. Zheng, Y. Zhu, M. Varela, J. Wu and C. Leighton, *Phys. Rev.*  
415 *Lett.*, 2007, **99**, 47203-47203.
- 416 11. J. Gazquez, W. Luo, M. P. Oxley, M. Prange, M. A. Torija, M. Sharma, C.  
417 Leighton, S. T. Pantelides, S. J. Pennycook and M. Varela, *Nano Lett.*, 2011,  
418 **11**, 973-976.
- 419 12. J. H. Kwon, W. S. Choi, Y. K. Kwon, R. Jung, J. M. Zuo, H. N. Lee and M.  
420 Kim, *Chem. Mater.*, 2014, **26**, 2496-2501.
- 421 13. B. H. Han, D. N. Qian, M. Risch, H. L. Chen, M. F. Chi, Y. S. Meng and Y.  
422 Shao-Horn, *J. Phys. Chem. Lett.*, 2015, **6**, 1357-1362.
- 423 14. S. M. Zhou, X. B. Miao, X. Zhao, C. Ma, Y. H. Qiu, Z. P. Hu, J. Y. Zhao, L.  
424 Shi and J. Zeng, *Nat. Commun.*, 2016, **7**, 11510.
- 425 15. Y. Z. Jin, Z. Li, J. Q. Wang, R. Li, Z. Q. Li, H. Liu, J. Mao, C. K. Dong, J.

- 426 Yang, S. Z. Qiao and X. W. Du, *Adv. Energy Mater.*, 2018, **8**, 1703469.
- 427 16. J. N. Nørskov, F. Studt, F. Abildpedersen and T. Bligaard, *Fundamental*  
428 *Concepts in Heterogeneous Catalysis*, John Wiley and Sons, Inc, 2014.
- 429 17. T. Wang, C. Zhang, J. Y. Wang, H. Y. Li and Z. J. Xu, *J. Catal.*, 2020, **390**, 1-  
430 11.
- 431 18. M. Alifanti, M. Florea, S. Somacescu and V. I. Parvulescu, *Appl. Catal. B-*  
432 *Environ.*, 2005, **60**, 33-39.
- 433 19. Y. X. Liu, H. X. Dai, J. G. Deng, L. Zhang and G. S. Guo, *Inorg. Chem.*,  
434 2013, **52**, 8665-8676.
- 435 20. D. A. Aguilera, A. Perez, R. Molina and S. Moreno, *Appl. Catal. B-Environ.*,  
436 2011, **104**, 144-150.
- 437 21. S. Zhao, K. Z. Li and J. H. Li, *Appl. Catal. B-Environ.*, 2016, **181**, 236-248.
- 438 22. J. G. Deng, H. X. Dai, H. Y. Hang, L. Zhang, G. Z. Wang, H. E. Hong and C.  
439 T. Au, *Environ. Sci. Technol.*, 2010, **44**, 2618-2623.
- 440 23. J. G. Deng, L. Zhang, H. X. Dai and C. T. Au, *Appl. Catal. A-Gen.*, 2009, **352**,  
441 43-49.
- 442 24. X. W. Li, H. X. Dai, J. G. Deng, Y. X. Liu, Z. X. Zhao, Y. Wang, H. G. Yang  
443 and C. T. Au, *Appl. Catal. A-Gen.*, 2013, **458**, 11-20.
- 444 25. N. A. Merino, B. P. Barbero, P. Grange and L. Cadús, *J. Catal.*, 2005, **231**,  
445 232-244.
- 446 26. Z. X. Zhu, Y. N. Shi, C. Aruta and N. Yang, *ACS Appl. Energ. Mater.*, 2018,  
447 **1**, 5308-5317.
- 448 27. L. Daheron, R. Dedryvere, H. Martinez, M. Menetrier, C. Denage, C. Delmas  
449 and D. Gonbeau, *Chem. Mater.*, 2008, **20**, 583-590.
- 450 28. V. Bellière, G. Joost, O. Stephan, F. D. Groot and B. M. Weckhuysen, *J.*  
451 *Phys. Chem. B*, 2006, **110**, 9984-9990.
- 452 29. L. Guan, K. Suenaga, S. Okubo, T. Okazaki and S. Lijima, *J. Am. Chem. Soc.*,  
453 2008, **130**, 2162-2163.
- 454 30. Z. P. Li, M. Toshiyuki, G. J. Auchterlonie, J. Zou and D. John, *ACS Appl.*  
455 *Mater. Interf.*, 2011, **3**, 2772-2778.

- 456 31. H. F. Hu, Y. M. Zhu, X. Y. Shi, Q. Li and R. D. Zhong, *Phys. Rev. B*, 2014,  
457 **90**, 134518-134518.
- 458 32. S. Yamaguchi, Y. Okimoto and Y. Tokura, *Phys. Rev. B*, 1997, **55**, 8666-8669.
- 459 33. I. Fita, V. Markovich, A. Wisniewski, D. Mogilyansky, R. Puzniak, P.  
460 Iwanowski, L. Meshi, L. Titelman, V. N. Varyukhin and G. Gorodetsky, *J.*  
461 *Appl. Phys.*, 2010, **108**, 063907.
- 462 34. A. Gholizadeh, *J. Am. Ceram. Soc.*, 2017, **100**, 859-866.
- 463 35. N. A. Merino, B. P. Barbero, P. Eloy and L. E. Cadus, *Appl. Surf. Sci.*, 2006,  
464 **253**, 1489-1493.
- 465 36. H. Y. Zhu, P. F. Zhang and S. Dai, *ACS Catal.*, 2015, **5**, 6370-6385.
- 466 37. S. M. Zhou, L. Shi, J. Y. Zhao, L. F. He, H. P. Yang and S. M. Zhang, *Phys.*  
467 *Rev. B*, 2007, **76**, 172407.
- 468
